1 **TITLE**

2 **Ecological load and balancing selection in circumboreal barnacles**

3

4 **AUTHORS**

5 *Joaquin C. B. Nunez<sup>a</sup>, Stephen Rong<sup>ab</sup>, Alejandro Damian-Serrano<sup>c</sup>, John T. Burley<sup>ad</sup>,*  
6 *Rebecca G. Elyanow<sup>b</sup>, David A. Ferranti<sup>a</sup>, Kimberly B. Neil<sup>a</sup>, Henrik Glenner<sup>e</sup>, Magnus*  
7 *Alm Rosenblad<sup>f</sup>, Anders Blomberg<sup>f</sup>, Kerstin Johannesson<sup>g</sup>, and David M. Rand<sup>ab</sup>*

8

9 **AUTHOR AFFILIATIONS:**

10 <sup>a</sup> Department of Ecology and Evolutionary Biology, Brown University, 80 Waterman  
11 Street, Providence RI 02912, USA.

12 <sup>b</sup> Center for Computational Molecular Biology, Brown University, 164 Angell Street,  
13 Providence RI 02912, USA.

14 <sup>c</sup> Department of Ecology and Evolutionary Biology, Yale University, 165 Prospect St, New  
15 Haven, CT 06511, USA.

16 <sup>d</sup> Institute at Brown for Environment and Society, Brown University, 75 Waterman Street,  
17 Providence RI 02912, USA.

18 <sup>e</sup> Department of Biological Sciences, University of Bergen, *Thormøhlensgt 53 A/B*,  
19 Bergen, Norway

20 <sup>f</sup> Department of Chemistry and Molecular Biology, University of Gothenburg, Lundberg  
21 Laboratory, *Medicinaregatan 9 C*, Göteborg, 41390, Sweden.

22 <sup>g</sup> Department of Marine Sciences, University of Gothenburg, Tjärnö Marine Laboratory,  
23 Strömstad, 452 96, Sweden

24

25 **CORRESPONDING AUTHORS:**

26 [joaquin\\_nunez@brown.edu](mailto:joaquin_nunez@brown.edu); [david\\_rand@brown.edu](mailto:david_rand@brown.edu)

27

28 **KEYWORDS:**

29 Barnacles, *Semibalanus balanoides*, Balancing selection, Ecological genomics, Ecological  
30 load

## 31 **Abstract**

32 Acorn barnacle adults experience environmental heterogeneity at various spatial  
33 scales of their circumboreal habitat, raising the question of how adaptation to high  
34 environmental variability is maintained in the face of strong juvenile dispersal and  
35 mortality. Here we show that 4% of genes in the barnacle genome experience balancing  
36 selection across the entire range of the species. Many of these genes harbor mutations  
37 maintained across 2 million years of evolution between the Pacific and Atlantic oceans.  
38 These genes are involved in ion regulation, pain reception, and heat tolerance, functions  
39 which are essential in highly variable ecosystems. The data also reveal complex  
40 population structure within and between basins, driven by the trans-Arctic interchange  
41 and the last glaciation. Divergence between Atlantic and Pacific populations is high,  
42 foreshadowing the onset of allopatric speciation, and suggesting that balancing selection  
43 is strong enough to maintain functional variation for millions of years in the face of  
44 complex demography.

45

## 46 **Introduction**

47 The relationship between genetic variation and adaptation to heterogeneous  
48 environments remains a central conundrum in evolutionary biology (Botero, et al. 2015).  
49 Classical models of molecular evolution predict that populations should be locally  
50 adapted to maximize fitness (Williams 1966). However, species inhabiting highly  
51 heterogeneous environments violate this expectation: if gene flow is high in relation to  
52 the scale of environmental heterogeneity, species will harbor variation that is beneficial  
53 in one condition but deleterious in another (Gillespie 1973), and the resulting ecological  
54 load (i.e., the fitness difference between the best and the average genotype across the  
55 range of environments where offspring may settle) will prevent local adaptation.  
56 Conversely, if gene flow is low, favored alleles will become locally fixed and species should  
57 display low levels of genetic variation. Paradoxically, many natural populations living in  
58 variable environments possess high dispersal capabilities, and harbor more variation  
59 than expected under classical models (Metz and Palumbi 1996; Mackay, et al. 2012;  
60 Messer and Petrov 2013; Bergland, et al. 2014). This disconnect between nature and  
61 theory has motivated the hypothesis that balancing selection, a process where selection

62 favors multiple beneficial alleles at a given locus, is at play to maintain adaptations in  
63 these habitats (Levene 1953; Hedrick 2006).

64 The northern acorn barnacle (*Semibalanus balanoides*) is a model system to study  
65 adaptations to ecological variability. This barnacle is a self-incompatible, simultaneous  
66 hermaphrodite which outcross only with adjacent individuals. Adult barnacles are fully  
67 sessile and occupy broad swaths of intertidal shores in both the North Pacific and North  
68 Atlantic oceans. These habitats experience high levels of cyclical and stochastic ecological  
69 heterogeneity which impose strong selection at multiple spatial scales: microhabitats  
70 (intertidal shores), mesohabitats (bays and estuaries) and macrohabitats (continental  
71 seaboard) (Schmidt, et al. 2008; Nunez, et al. 2020). Barnacle larvae, on the other hand,  
72 engage in extensive pelagic dispersal by ocean currents, and may settle in habitats  
73 completely different from those of their parents (Flowerdew 1983). This contrast between  
74 strong adult selection and high juvenile dispersal prevents local adaptation. In addition,  
75 *S. balanoides* has a complex demography. It originated in the Pacific, and colonized the  
76 Atlantic during the many waves of the trans-Arctic interchange (1-3 mya) (Vermeij 1991).  
77 Like most circumboreal species, it was subjected to drastic range shifts due to the  
78 Pleistocene glacial cycles (Wares and Cunningham 2001; Flight, et al. 2012), and more  
79 recently due to anthropogenic climate change (Jones, et al. 2012). As such, *S. balanoides*  
80 is a premier system to study how adaptive genetic variation is maintained over broad  
81 spatial and evolutionary scales, in the face of ecological load.

82 Three decades of work have shown that balancing selection, via marginal  
83 overdominance (a case where the harmonic mean fitness of heterozygous genotypes must  
84 be larger than that of either homozygote) (Levene 1953), maintains adaptive variation at  
85 the metabolic gene Mannose-6-phosphate isomerase (*Mpi*) in barnacles across the entire  
86 North Atlantic basin (Schmidt and Rand 1999; Dufresne, et al. 2002; Rand, et al. 2002;  
87 Veliz, et al. 2004; Nunez, et al. 2020). These findings motivate two questions which are  
88 addressed in this paper. First, how pervasive are balanced polymorphisms in the barnacle  
89 genome? And, second, what genes are targets of balancing selection? To investigate  
90 functional polymorphism in *S. balanoides*, we quantified genomic variation in North  
91 Pacific and North Atlantic populations (**Figs. 1A-1C**). In the Pacific, we analyzed samples  
92 from British Columbia, Canada (**WCAN**) as well as a sample of the sister taxon  
93 *Semibalanus cariosus*. In the Atlantic, we analyzed samples from Maine (**ME**), Rhode

94 Island (**RI**), Iceland (**ICE**), Norway (**NOR**), and the United Kingdom (**UK**). For all  
95 populations, we sequenced multiple libraries including: a single individual barnacle  
96 genome to ~50X coverage, pools of 20-38 individuals per population (i.e., pool-seq  
97 (Schlotterer, et al. 2014)), as well as ~600 bp amplicons from the mitochondrial  
98 (**mtDNA**) *COX I* gene (including previously published *COX I* data(Wares and  
99 Cunningham 2001)). We mapped these datasets to our newly assembled *S. balanoides*  
100 genome (**SI Appendix 1**) and characterized genetic diversity across all populations (**SI**  
101 **Appendix 2**). We first present our findings in the context of the barnacle's  
102 phylogeography and demographic history. This is pivotal to understand the historical  
103 conditions which can contribute to ecological load. Then, we characterize the  
104 pervasiveness of balancing selection across the genome, as well as the age of balanced  
105 polymorphisms and their putative functional significance in highly heterogeneous  
106 environments.

107

## 108 **Results**

109 **Standing variation across oceans.** Our pool-seq panels discovered ~3M high  
110 quality single nucleotide polymorphisms (**SNPs**) across populations at common allele  
111 frequencies (>5%). When linkage is removed at 500 bp, the SNP panel thins to ~690,000.  
112 Principal component analysis (PCA), on the LD-thinned SNPs, shows that variation is  
113 strongly subdivided by ocean basins (**Fig. 1D**). PC 1 captures 74% of the variation, and  
114 partitions populations across basins. PC 2 (8.5% var.) partitions Atlantic populations into  
115 2 discrete east-west clusters. The western cluster contains ME, RI, ICE, and the eastern  
116 cluster contains UK and NOR. These clusters are supported by the abundance of mtDNA  
117 haplotypes within and between ocean basins (**Fig. 1D inset; Table S1**)(Wares and  
118 Cunningham 2001; Flight, et al. 2012; Nunez, et al. 2018). The large divergence between  
119 oceans is also captured in levels of nucleotide diversity ( $\pi$ ; a metric of standing genetic  
120 variation). Surprisingly, North Atlantic populations harbor more genetic variation ( $\pi =$   
121 1.05%) than their Pacific, ancestral, conspecifics ( $\pi = 0.55%$ ; **Fig. 1E; Fig. S1**). We also  
122 estimated the Tajimas' *D* statistic (**D**), a measure of the excess ( $D < 0$ ), or deficit ( $D > 0$ ), of  
123 rare alleles in populations. These data indicate that all North Atlantic populations,  
124 especially NOR, have negatively skewed genome-wide values of *D* (**Figs. 1E, S2**).

125           **Historical phylogeography and structure.** We reconstructed changes of  
126 historical effective population sizes ( $N_e$ ) with the multiple sequentially Markovian  
127 coalescent model (MSMC) using individual whole genomes (Schiffels and Durbin 2014).  
128 Our results provide evidence for different phylogeographic trajectories in response to the  
129 events of the glaciations (**Figs. 1G, 1H**). For instance, the Eastern Cluster and the  
130 Western Cluster populations shared a common demography throughout the Pleistocene  
131 (**Fig. 1G**) but diverged in recent geological time. Namely, Eastern populations (especially  
132 NOR) experienced striking increases in  $N_e$  in the recent past (**Fig. 1I**), likely following the  
133 asynchronous deglaciation of the Fennoscandian ice sheet (Ruddiman and McIntyre 1981;  
134 Patton, et al. 2017). Western populations, on the other hand, experienced a demographic  
135 contraction which started during the last glacial period and ended during the last glacial  
136 maxima (~20 kya; **Fig. 1J**) (Brochmann, et al. 2003; Maggs, et al. 2008; Flight, et al.  
137 2012).

138           We estimated gene flow by computing  $f_3$  statistics (Reich, et al. 2009) for all  
139 possible combinations of target, source 1, and source 2 populations, using individual  
140 whole genomes (**Fig. S3; Table S2**). Our analysis finds no evidence of recent gene flow  
141 across oceans. This result is supported by two additional lines of evidence. First, a mtDNA  
142 molecular clock analysis (Drummond, et al. 2002), which suggests that Pacific and  
143 Atlantic populations have not exchanged migrants in nearly 2 million years (**SI**  
144 **Appendix 3**). And second, estimates of genetic differentiation (i.e.,  $F_{ST}$ ) which reveal  
145 large amounts of genome-wide divergence (**Fig. S4**), and foreshadows the onset of  
146 allopatric speciation across oceans. Within the North Atlantic,  $F_{ST}$  is low (likely due to  
147 shared demography until the glacial maximum) and the  $f_3$  analysis suggest that admixture  
148 is pervasive (**Fig. S3, Table S2**). These findings are supported by additional ABBA-  
149 BABA tests for gene tree heterogeneity (Green, et al. 2010) (see **SI Appendix 4**). Overall,  
150 these findings present three important points. First, they exemplify the complex  
151 demography that underlie standing variation in natural populations. Second, they  
152 confirm that barnacles harbor high levels of genetic variation genome-wide. And third,  
153 they reveal the pervasiveness of gene flow and shared variation within ocean basins,  
154 where environmental heterogeneity is extensive across “micro” (1-3 meter) and “meso”  
155 (1-10 kilometer) scales. These conditions provide the environmental context for ecological  
156 load at the genomic scale.

157           **Balancing selection in barnacles.** Balancing selection is expected to produce  
158 molecular and phylogenetic footprints not consistent with neutrality (Fijarczyk and Babik  
159 2015). Molecular footprints include: enrichment of old alleles (e.g., trans-species  
160 polymorphisms; **TSPs**), elevated genetic variation (high  $\pi$ ), deficit of rare alleles ( $D > 0$ ),  
161 excess SNPs at medium allele frequencies, reduced divergence around the balanced locus  
162 (low  $F_{ST}$ ), as well as the accumulation of non-synonymous variation in the vicinity of  
163 balanced polymorphisms, a phenomenon known as sheltered load (Uyenoyama 2005).  
164 Likewise, balancing selection will produce a phylogenetic signal composed of diverged  
165 clades, corresponding to the balanced haplotypes. Deeply diverged clades will occur when  
166 balancing selection has maintained variation over long evolutionary times (i.e., ancestral  
167 balancing selection(Fijarczyk and Babik 2015)). A joint analysis of our Pacific, Atlantic,  
168 and outgroup (*S. cariosus*) datasets reveal 11,917 cosmopolitan SNPs (i.e., SNPs that  
169 segregate in both oceans) which are also TSPs (**Dataset S1**). TSPs, genome-wide, occur  
170 in 0.14% coding regions, 0.21% in introns, 0.02 % in promoters, 0.01% in 5'UTRs, and <  
171 0.01% in 3'UTRs. The remainder TSPs occur in 0.09% of intergenic regions. An  
172 enrichment analysis which compares the abundance of TSPs, of each genomic class,  
173 relative to all discovered SNPs, reveals that TSPs are significantly over-enriched in coding  
174 loci (**Fig. 2A**), and 4,415 segregate at high frequencies in all populations (TSPs with  
175 heterozygosity [ $H_E$ ] > 0.30; **Fig. S5**). These patterns of variation could be the result of  
176 neutral processes such as recurrent mutation (homoplasy) across all populations of either  
177 species. However, the enrichment of cosmopolitan, nonsynonymous, TSPs at common  
178 frequencies is not consistent with neutrality. Under a model of strict neutrality,  
179 segregating mutations are eventually lost in populations after speciation (Clark 1997).  
180 Moreover, coding regions are subjected to purifying selection which removes deleterious  
181 and mildly deleterious nonsynonymous variants (Hartl and Clark 1997).

182           We compared patterns of genetic variation in exons bearing TSPs and other exons.  
183 When accounting for exon length, we observe consistently elevated values of  $D$  and  $\pi$  for  
184 TSP-bearing exons relative to other exons (**Figs. 2B and 2C; S6**). Except for the ME vs.  
185 RI comparison (**Fig. S7**), TSP-bearing exons have consistently low  $F_{ST}$  values (**Fig. 2D**).  
186 To quantify sheltered load, we compared the ratio of  $H_E$  values at nonsynonymous (**NS**)  
187 and synonymous (**S**) mutations in TSP-bearing and other exons. Our results show that  
188 medium sized TSP-bearing exons (~500 bp) harbor an excess of non-synonymous NS  $H_E$



189 (**Fig. 2E**). Notably, we observed that differences between TSP-bearing and other exons  
190 become less apparent as exons get longer. This regionalization of the signal occurs due to  
191 the small linkage blocks in the species (Nunez, et al. 2020). We observe 1,107 TSPs that  
192 cause nonsynonymous changes and occur in 312 genes with high confidence annotations  
193 (4%; **Dataset S2**). Consistent with our expectation of balancing selection, site frequency  
194 spectrum (**SFS**) analyses show that these 312 genes harbor an excess of SNPs at medium  
195 allele frequencies relative to other annotated genes (**Fig. 2F**).

196 **Age of balanced polymorphisms.** To determine the age of balanced  
197 polymorphisms, we ran topological tests on the allele trees for each TSP region across the  
198 312 candidate genes. We built trees using phased haplotypes for each TSP-bearing region  
199 for all single individual genomes. We used these allele trees to compute the cophenetic  
200 distance (**CPD**) between tips. We classified allele trees as having or lacking highly  
201 diverged alleles based on the relative mean CPD between haplotypes from the same  
202 population vs. from different populations ( $CPD_{w-b}$ ; **see supplementary methods**). The  
203 analysis reveals that of the 312 allele trees, 150 carry a significant signature of ancestral  
204 balancing selection ( $CDP_{w-b} > 0$ , Bonferroni  $P < 1 \times 10^{-9}$ ; **Fig. 2G; Dataset S2**). This  
205 suggests maintenance of diverged haplotypes for more than 2 million years, with extreme  
206 cases in which haplotypes are shared across species (8-10 million years)(Perez-Losada, et  
207 al. 2008; Herrera, et al. 2015). The remaining genes with  $CDP_{w-b} < 0$  may either represent  
208 cases where the balanced alleles are younger, or oversampling of homozygous individuals  
209 for any given marker.

210 **Targets of selection.** We partitioned our dataset among genes with positive and  
211 negative  $CPD_{w-d}$  allele trees and conducted gene ontology (GO) enrichment analyses. The  
212 150 genes with positive  $CPD_{w-d}$  trees show enrichment for terms related to “ion channel  
213 regulation”, including genes involved in environmental sensing, and circadian rhythm  
214 regulation (**Table S3**). We show examples for 3 candidate genes under ancestral  
215 balancing selection involved in environmental sensing: 1) the painless gene (*Pain*; g1606;  
216 **Fig. 3A**), which is involved in nociception (i.e., pain reception), as well as detection of  
217 heat and mechanical stimuli (Tracey, et al. 2003; Xu, et al. 2006); 2) the Pyrexia gene  
218 (*Pyx*; g3472; **Fig. 3B**), which is involved in negative geotaxis, and responses to heat (Lee,  
219 et al. 2005); and 3) the shaker cognate w gene (*Shaw*; g3310; **Fig. 3C**), which is involved  
220 in regulation of circadian rhythm (Hodge and Stanewsky 2008; Buhl, et al. 2016). These

221 three examples showcase canonical footprints of balancing selection around the TSP,  
222 concomitant with a bimodal allele tree. Among genes with negative  $CPD_{w-d}$  we observe  
223 enriched functions for “anatomical structure formation” including genes coding for motor  
224 proteins and muscle genes (**Table S4**). In all cases, we used RNA-seq data from ME  
225 individuals to confirm that these loci are expressed in adult barnacles.

226

## 227 **Discussion**

228 In intertidal barnacles, the dichotomy of strong adult selection and high offspring  
229 dispersal means that any allele that is beneficial to parental fitness in one generation may  
230 be neutral or deleterious in the next (Gillespie 1973). This leads to a fundamental question  
231 in evolutionary biology: how are adaptations maintained in the face of extreme ecological  
232 variability? In this paper, we provide evidence that balancing selection is widespread  
233 across the barnacle genome, with 4% of annotated genes harboring functional balanced  
234 polymorphisms. Notably, these polymorphisms occur in genes with important functions  
235 for life in variable environments, and many have been maintained for at least 2 million  
236 years despite a complex phylogeographic history (Wares and Cunningham 2001; Flight  
237 and Rand 2012). Naturally, the heterogeneous nature of the rocky intertidal imposes a  
238 segregation ‘cost’ for these balanced polymorphisms, as they occur in individuals that,  
239 due to high dispersal, recruit in sub-optimal habitats for any given genetic makeup. This  
240 ecological load, defined as  $L_e = (W_{max} - \bar{W}) / W_{max}$  (where  $\bar{W}$  is mean fitness, and  $W_{max}$   
241 is optimal fitness, across all habitats), will be substantial, as demonstrated by  
242 comprehensive recruitment studies in natural habitats (Bertness 1989; Bertness, et al.  
243 1992; Pineda, et al. 2006). For example, at initial settlement, barnacle density can be as  
244 high as 76 individuals per  $cm^2$ , but at maturity, it can be as low as 0.15 individuals per  
245  $cm^2$  (0.2% survival)(Pineda, et al. 2006). This mass mortality is habitat- and genotype-  
246 dependent (Schmidt and Rand 2001). This is the type of ‘fitness cost’ envisioned in the  
247 Levene model of balancing selection (Levene 1953). As such, our data suggests that the  
248 problem of ecological load is a defining condition of the barnacle life cycle. And, more  
249 generally, it argues in favor of balancing selection, via marginal overdominance, as the  
250 fundamental process underlying maintenance of adaptation in variable environments.



251           **Is pervasive balancing selection plausible in nature?** Under classical  
252 models of population genetics, when loci are considered to be independent of each other,  
253 the additive effects of widespread balanced polymorphism results in unbearable amounts  
254 of fitness variance and genetic death (Kimura and Crow 1964; Lewontin and Hubby 1966).  
255 However, if balanced loci have interactive effects (e.g., epistasis), multiple  
256 polymorphisms could be maintained with minimum effects on the distribution of fitness  
257 variance (King 1967; Milkman 1967; Sved, et al. 1967; Wittmann, et al. 2017). Based on  
258 this theoretical framework, multiple models have been developed to describe the  
259 conditions that favor the long-term maintenance of functional variation in spatially  
260 varying environments (Gillespie 1973; Hedrick, et al. 1976). Moreover, polymorphisms  
261 will be less likely to be lost if there is a large number of ecological niches available, if there  
262 is migration among niches, and if individuals are proactive in choosing niches where their  
263 fitness is maximized (Hedrick, et al. 1976). We argue that barnacles satisfy these  
264 conditions to some degree.

265           First, while it is useful to summarize intertidal heterogeneity in the form of discrete  
266 microhabitats (Schmidt, et al. 2000), individual barnacles experience the rocky shore as  
267 a complex tapestry of interactive stressors at three spatial levels. At microhabitats scales,  
268 the upper and lower tidal zones pose diametrically different ecological challenges in terms  
269 of food availability, competition, predation, and risk of desiccation (Bertness, et al. 1991;  
270 Schmidt and Rand 1999, 2001). At mesohabitat scales, open coasts vs. sheltered estuaries  
271 vary in their exposure to wave action, upwelling dynamics, and biotic interactions  
272 (Sanford and Menge 2001; Dufresne, et al. 2002; Veliz, et al. 2004). These, in turn,  
273 modify micro-level stressors. Lastly, at macrohabitat scales, topological differences across  
274 shores and latitudinal variations in tidal range produce a mosaic of thermal stress along  
275 continents (Helmuth, et al. 2002). Consequentially, what selection pressures are more  
276 important for any given barnacle will emerge from the interactions among these stress  
277 gradients. This complex landscape of selection has been captured in studies of the  
278 barnacle *Mpi* gene. Accordingly, the locus is under selection at micro-levels in the Gulf of  
279 Maine (Schmidt and Rand 1999; Schmidt, et al. 2000), at meso-levels in the gulf of St.  
280 Lawrence (Canada)(Dufresne, et al. 2002; Veliz, et al. 2004), yet it shows tepid signs of  
281 selection in the Narragansett Bay (Rhode Island)(Rand, et al. 2002; Nunez, et al. 2020).  
282 Similar complexity has also been captured in temperate populations of *Drosophila*. In

283 these, idiosyncratic weather effects can alter the dynamics of seasonal adaptation  
284 (Bergland, et al. 2014; Machado, et al. 2019). Second, the high dispersal capacity of the  
285 larval stage ensures constant migration between these niches across generations. Finally,  
286 barnacles also have the ability to choose preferred substrates during settlement. This  
287 occurs during the spring when barnacle larvae extensively survey microhabitats for  
288 biological, chemical and physical cues produced by previous settlers before making final  
289 commitments of where to settle (Bertness, et al. 1992). Unfortunately for the barnacle,  
290 this capacity for substrate choice does not mitigate mass mortality during late summer,  
291 which leads to strong selection for particular genotypes (Schmidt and Rand 2001).  
292 Nevertheless, these behaviors may constitute a form of adaptive plasticity, helping  
293 barnacles choose habitats where their fitness may be marginally improved. Overall, this  
294 suggests that the barnacle's life history is conducive to the maintenance of balanced  
295 polymorphisms.

296 **What variation is under selection?** Our analyses indicate that 4% (312) of all  
297 annotated genes are experiencing some form of balancing selection across the entire  
298 range of the species. This number of genes harboring ancestral polymorphisms is similar  
299 to that observed in *Arabidopsis thaliana* and its close relative *Capsella rubella* (433  
300 genes)(Wu, et al. 2017). Similar to *Semibalanus*, these plants diverged ~8 mya, and their  
301 natural populations experience high levels of ecological heterogeneity (Bakker, et al.  
302 2006). We must acknowledge that our number may be an underestimation driven by the  
303 nascent state of the genomic tools in *Semibalanus*. Future genome assemblies, combined  
304 with improved annotations, will undoubtedly yield a more complete picture of functional  
305 variation in the species. In addition, it will allow for a more comprehensive  
306 characterization of selection in structural variants and regulatory loci, which have been  
307 shown to be fundamental in the evolution of complex phenotypes (Wray 2007; Faria, et  
308 al. 2019). Despite these limitations, our analysis recovered a large number of genes  
309 involved in key functions for life in variable environments. These will be subjects of future  
310 validation studies. For instance, the general enrichment for ion channel genes suggests  
311 selection related to osmotic regulation (Sundell, et al. 2019). This hypothesis is highly  
312 plausible given that intertidal ecosystems experience strong salinity fluctuations,  
313 repeatedly exposing barnacles to osmotic challenges at all spatial scales. In addition, we  
314 observe targets of selection involved in environmental sensing loci (e.g., *pain*, *pyx*, and

315 *shaw*; **Fig. 3**). Similar to osmotic regulation, selection on these genes is entirely plausible  
316 given the inherent variability of intertidal habitats. An important hypothesis from the  
317 allozyme era is the idea that balancing selection would target genes at the node of  
318 metabolic fluxes (Eanes 1999; Watt and Dean 2000). In such cases, balanced variation  
319 would provide biochemical flexibility to cope with environmental heterogeneity. In the  
320 same vein, we hypothesize that balancing selection may act more often on “sensor genes”  
321 which control plastic responses to ecological variation. Testing this hypothesis is beyond  
322 the scope of this paper and would require the use of allele-specific differential expression  
323 experiments in barnacles.

324 **Complex demography and speciation.** Our demographic analyses provide  
325 clues about how historical events affected genetic variation in barnacle populations. In  
326 the Atlantic, our evidence suggests a shared demography throughout the Pleistocene, and  
327 that the modern Eastern and Western clusters formed in response to recent events of last  
328 glacial cycle. These findings highlight that the low  $F_{ST}$  values observed within the basins  
329 arise due to shared ancestry. Moreover, they also suggest that population structure  
330 persists in the presence of gene flow. As such, while larvae have the capacity to disperse  
331 for hundreds of kilometers, ocean currents (Nunez, et al. 2018) and different estuarine  
332 flushing times (Brown, et al. 2001) allow regions to retain some level of geographical  
333 structuring (Johannesson, et al. 2018; Nunez, et al. 2018). Comparisons between oceans  
334 reveal a stark pattern of genome wide divergence. This pattern is driven by the separation  
335 of Pacific and Atlantic populations following the events of the trans-Arctic interchange  
336 (Vermeij 1991). Accordingly, the negative levels of  $D$  in the north Atlantic may reflect the  
337 effect of bottlenecks during the trans-Arctic interchange. Notably, the high levels of  $\pi$  in  
338 the Atlantic is not concordant with predictions of common colonization models in which  
339 variation of the younger population is a subset of the ancestral population (Maggs, et al.  
340 2008). We hypothesize this could be the result of ancient admixture due to repeated  
341 trans-Arctic invasions from the Pacific (Väinölä 2003). We recognize that ancestral  
342 admixture could generate artificial signatures of balancing selection via the mixing of  
343 highly differentiated haplotypes. However, such an occurrence would affect most genes  
344 in the genome. Our evidence shows that the signatures of balancing selection are highly  
345 localized in TSP-regions. For example, while  $D$  is elevated in TSP-regions, it is negatively  
346 skewed genome-wide. Our data does not support recent gene flow between ocean basins.

347 As such, after 2 million years of separation, neutral divergence appears to be driving  
348 Atlantic and Pacific populations to speciate in allopatry. A closer look to this hypothesis  
349 will require crossing individuals from both basins, and surveying offspring fitness and  
350 viability. More salient, however, is the observation of shared haplotypes between oceans  
351 in our candidate genes for balancing selection. In light of such strong background  
352 divergence, this provides evidence that balancing selection on most of these genes is  
353 strong, and that polymorphisms have been maintained for long periods of time.

354

## 355 **Materials & Methods**

356 **Barnacle Collections.** Barnacle samples were collected from Damariscotta  
357 (Maine, United States; ME), Jamestown (Rhode Island, United States, RI), Calvert Island  
358 (British Columbia, Canada; WCAN), Reykjavik (Iceland; ICE), Porthcawl (Wales, United  
359 Kingdom; UK), and Norddal (Norway; NOR). Additional samples were collected in  
360 Bergen (Norway), Tórshavn (Faroe Island), and Tjärnö (Sweden). For all samples, species  
361 identities were confirmed using Sanger sequencing of the mtDNA COX I region (Bucklin,  
362 et al. 2011). For the WCAN, RI, ME, ICE, UK, and NOR population we collected a single  
363 individual for DNA-seq, and a group of 20-40 individuals for pool-seq (**SI Appendix 2**).  
364 RNA-seq was done on four individuals from Maine. DNA-seq was done on a single  
365 individual from the sister taxa *S. cariosus*. DNA/RNA was extracted using Qiagen  
366 DNeasy/RNeasy kits. All pools and single individuals were sequenced in their own lanes  
367 of an Illumina machine by GENEWIZ LLC using 2x150 paired-end configuration.

368 **Mapping datasets to the genome.** Samples were mapped to a genome  
369 assembled *de novo* for the species (Sbal3.1; NCBI GenBank: VOPJ00000000; **SI**  
370 **Appendix 1**). The genome was assembled using a hybrid approach which combines  
371 PacBio reads and Illumina reads using DBG2OLC (Ye, et al. 2016) and Redundans (Pryszcz  
372 and Gabaldon 2016). Gene models were constructed using an *ab initio* method,  
373 AUGUSTUS (Stanke and Waack 2003), informed by evidence from the RNA-seq. A gene  
374 feature file (GFF) is available as **Dataset S4**. The model used for gene prediction was  
375 trained in *Drosophila melanogaster*. Genes were annotated by pairwise blast against the  
376 *Drosophila melanogaster* genome (Dmel6; NCBI GenBank: GCA\_000001215.4). All  
377 annotations are available as **Dataset S5**. DNA reads from all populations were mapped

378 to Sbal3.1 using bwa mem(Li 2013). RNA reads were mapped using HiSat2(Kim, et al.  
379 2015). SNPs were called using the samtools pipeline(Li, et al. 2009).

380 **Genome analyses.** Estimates of  $\pi$  and  $D$  were done using the popoolation-1  
381 suite(Kofler, Orozco-terWengel, et al. 2011). Estimations of allele frequencies and  $F_{ST}$   
382 were done using the popoolation-2 suite(Kofler, Pandey, et al. 2011). Demographic  
383 reconstructions were done using MSMC(Schiffels and Durbin 2014). The  $f_3$  statistics were  
384 estimated using treemix(Pickrell and Pritchard 2012). Bayesian molecular clock analyses  
385 were done in BEAST2(Bouckaert, et al. 2014). ABBA/BABA statistics were calculated in  
386 *Dsuite*(Malinsky, et al. 2020). Phylogenetic inferences were done in iQtree(Chernomor,  
387 et al. 2016). GO enrichment analysis was done using GOrilla(Eden, et al. 2009) and GO  
388 terms inferred from our *Drosophila* annotation. The enrichment was assessed by  
389 comparing 2 genes list. The first composed of the genes of interest (i.e., the gene targets),  
390 the second one by all the genes annotated in Sbal3.1 (i.e., the gene universe). A detailed  
391 description of our analyses can be found in the supplementary methods section, as well  
392 as in GitHub: <https://github.com/Jcbnunez/BarnacleEcoGenomics>.

393

## 394 **Acknowledgements**

395 All the authors would like to acknowledge the Centre for Marine Evolutionary  
396 Biology (CeMEB) at the University of Gothenburg which organized the Marine Evolution  
397 2018 meeting in which most of the authors met and started this collaborative work. In  
398 addition, we acknowledge S. Ramachandran, E. Huerta-Sanchez, D. Sax, D. R. Gaddes,  
399 and R. E. F. Gordon, for their support and helpful insights. To E. Sanford for providing  
400 the sample of *S. cariosus*. To M. D. Rand and family for collecting barnacles in Nordall,  
401 Norway. To C. Harley for providing the samples from British Columbia. We thank the  
402 Natural Environment Research Council, the European Research Council, the Swedish  
403 Research Councils VR and Formas (Linnaeus grant to CeMEB), and *SciLife* Laboratory.  
404 This research was conducted using computational resources and services at the Center for  
405 Computation and Visualization, Brown University.

406

## 407 **Funding**

408 JCBN, KBN, and SR were supported by GRFP fellowships from the National  
409 Science Foundation (NSF). JCBN received additional support from the NSF-GROW

410 fellowship, as well as a KVA fellowship from the Swedish Royal Academy of Sciences. DAF  
411 was supported by a Brown University UTRA award. ADS was supported by the NSF grant  
412 OCE-1829835, and a Fulbright Spain Graduate Studies Scholarship. This work was  
413 supported by NSF (IGERT: DGE-0966060) and NIH (2R01GM067862) grants to DMR,  
414 a Carl Trygger Foundation grant (CTS 11:14) to MAR, grants from the Swedish Research  
415 Council number 2017-04559 to AB, and 2017-03798 to KJ, funding from the Meltzer  
416 Research Fund to HG, and funding from the Bushnell Graduate Research and Education  
417 Fund (EEB Doctoral Dissertation Enhancement Grant) to JCBN.

418

### 419 **Data deposition**

420 Data used in this paper are available in the National Center for Biotechnology  
421 Information (NCBI), <https://www.ncbi.nlm.nih.gov>. Raw reads were deposited under  
422 submission id: SUB6188969. SRAs are as follows: DNaseq datasets: SRR10011798,  
423 SRR10011802, SRR10011804, SRR10011805, SRR10011807–SRR10011810,  
424 SRR10011812–SRR10011814, SRR10011819, SRR10011825; PacBio dataset:  
425 SRR10011818; RNAseq datasets: SRR10011820–SRR10011823. MtDNA sequences for the  
426 COX I genes can be accessed from the following GeneBank accessions MG925538–  
427 MG925662, MG928281–MG928323, and MT329074–MT329592. Whole mtDNAs were  
428 deposited under accessions MGO10647, MGO10648, MGO10649, MT528636, MT528637.  
429 The barnacle genome (Sbal3.1) is available at NCBI (accession no. VOPJ00000000). A  
430 GitHub repository with code as well as with the supplementary datasets S1, S2, S3, S4,  
431 and S5, can be found at <https://github.com/Jcbnunez/BarnacleEcoGenomics>.



432 **References**

- 433
- 434 Bakker EG, Stahl EA, Toomajian C, Nordborg M, Kreitman M, Bergelson J. 2006.  
435 Distribution of genetic variation within and among local populations of *Arabidopsis*  
436 *thaliana* over its species range. *Mol Ecol* 15:1405-1418.
- 437 Bergland AO, Behrman EL, O'Brien KR, Schmidt PS, Petrov DA. 2014. Genomic  
438 Evidence of Rapid and Stable Adaptive Oscillations over Seasonal Time Scales in  
439 *Drosophila*. *PLoS Genet* 10:e1004775.
- 440 Bertness MD. 1989. Intraspecific Competition and Facilitation in a Northern Acorn  
441 Barnacle Population. *Ecology* 70:257-268.
- 442 Bertness MD, Gaines SD, Bermudez D, Sanford E. 1991. Extreme spatial variation in the  
443 growth and reproductive output of the acorn barnacle *Semibalanus balanoides*. *Marine*  
444 *Ecology Progress Series* 75:91-100.
- 445 Bertness MD, Gaines SD, Stephens EG, Yund PO. 1992. Components of recruitment in  
446 populations of the acorn barnacle *Semibalanus balanoides* (Linnaeus). *Journal of*  
447 *Experimental Marine Biology and Ecology* 156:199-215.
- 448 Botero CA, Weissing FJ, Wright J, Rubenstein DR. 2015. Evolutionary tipping points in  
449 the capacity to adapt to environmental change. *Proc Natl Acad Sci U S A* 112:184-189.
- 450 Bouckaert R, Heled J, Kuhnert D, Vaughan T, Wu CH, Xie D, Suchard MA, Rambaut A,  
451 Drummond AJ. 2014. BEAST 2: a software platform for Bayesian evolutionary analysis.  
452 *PLoS Comput Biol* 10:e1003537.
- 453 Brochmann C, Gabrielsen TM, Nordal I, Landvik JY, Elven R. 2003. Glacial survival or  
454 tabula rasa? The history of North Atlantic biota revisited. *Taxon* 52.
- 455 Brown AF, Kann LM, Rand DM. 2001. Gene flow versus local adaptation in the northern  
456 acorn barnacle, *Semibalanus balanoides*: insights from mitochondrial DNA variation.  
457 *Evolution* 55:1972-1979.

- 458 Bucklin A, Steinke D, Blanco-Bercial L. 2011. DNA Barcoding of Marine Metazoa. *Annu.*  
459 *Rev. Mar. Sci.* 3:471-508.
- 460 Buhl E, Bradlaugh A, Ogueta M, Chen KF, Stanewsky R, Hodge JJ. 2016. Quasimodo  
461 mediates daily and acute light effects on *Drosophila* clock neuron excitability. *Proc Natl*  
462 *Acad Sci U S A* 113:13486-13491.
- 463 Chernomor O, von Haeseler A, Minh BQ. 2016. Terrace Aware Data Structure for  
464 Phylogenomic Inference from Supermatrices. *Syst Biol* 65:997-1008.
- 465 Clark AG. 1997. Neutral behavior of shared polymorphism. *Proc Natl Acad Sci U S A*  
466 94:7730-7734.
- 467 Drummond AJ, Nicholls GK, Rodrigo AG, Solomon W. 2002. Estimating mutation  
468 parameters, population history and genealogy simultaneously from temporally spaced  
469 sequence data. *Genetics* 161:1307-1320.
- 470 Dufresne F, Bourget E, Bernatchez L. 2002. Differential patterns of spatial divergence in  
471 microsatellite and allozyme alleles: further evidence for locus-specific selection in the  
472 acorn barnacle, *Semibalanus balanoides*? *Molecular Ecology* 11:113-123.
- 473 Eanes WF. 1999. Analysis of Selection on Enzyme Polymorphisms. *Annual Review of*  
474 *Ecology and Systematics* 30:301-326.
- 475 Eden E, Navon R, Steinfeld I, Lipson D, Yakhini Z. 2009. GOrilla: a tool for discovery  
476 and visualization of enriched GO terms in ranked gene lists. *Bmc Bioinformatics* 10:48.
- 477 Faria R, Johannesson K, Butlin RK, Westram AM. 2019. Evolving Inversions. *Trends*  
478 *Ecol Evol* 34:239-248.
- 479 Fijarczyk A, Babik W. 2015. Detecting balancing selection in genomes: limits and  
480 prospects. *Mol Ecol* 24:3529-3545.
- 481 Flight PA, O'Brien MA, Schmidt PS, Rand DM. 2012. Genetic Structure and the North  
482 American Postglacial Expansion of the Barnacle, *Semibalanus balanoides*. *Journal of*  
483 *Heredity* 103:153-165.

- 484 Flight PA, Rand DM. 2012. Genetic variation in the acorn barnacle from allozymes to  
485 population genomics. *Integrative and Comparative Biology* 52:418-429.
- 486 Flowerdew MW. 1983. Electrophoretic Investigation of Populations of the Cirripede  
487 *Balanus-Balanoides* (L) around the North-Atlantic Seaboard. *Crustaceana* 45:260-278.
- 488 Gillespie J. 1973. Polymorphism in random environments. *Theoretical population*  
489 *biology* 4:193-195.
- 490 Green RE, Krause J, Briggs AW, Maricic T, Stenzel U, Kircher M, Patterson N, Li H,  
491 Zhai W, Fritz MH, et al. 2010. A draft sequence of the Neandertal genome. *Science*  
492 328:710-722.
- 493 Hartl DL, Clark AG. 1997. *Principles of population genetics*: Sunderland: Sinauer  
494 associates.
- 495 Hedrick PW. 2006. Genetic polymorphism in heterogeneous environments: The age of  
496 genomics. *Annual Review of Ecology Evolution and Systematics* 37:67-93.
- 497 Hedrick PW, Ginevan ME, Ewing. EP. 1976. Genetic polymorphism in heterogeneous  
498 environments. *Annual Review of Ecology and Systematics* 7.
- 499 Helmuth B, Harley CD, Halpin PM, O'Donnell M, Hofmann GE, Blanchette CA. 2002.  
500 Climate change and latitudinal patterns of intertidal thermal stress. *Science* 298:1015-  
501 1017.
- 502 Herrera S, Watanabe H, Shank TM. 2015. Evolutionary and biogeographical patterns of  
503 barnacles from deep-sea hydrothermal vents. *Mol Ecol* 24:673-689.
- 504 Hodge JJ, Stanewsky R. 2008. Function of the Shaw potassium channel within the  
505 *Drosophila* circadian clock. *PLoS ONE* 3:e2274.
- 506 Johannesson K, Ring AK, Johannesson KB, Renborg E, Jonsson PR, Havenhand JN.  
507 2018. Oceanographic barriers to gene flow promote genetic subdivision of the tunicate  
508 *Ciona intestinalis* in a North Sea archipelago. *Mar Biol* 165:126.

- 509 Jones SJ, Southward AJ, Wethey DS. 2012. Climate change and historical biogeography  
510 of the barnacle *Semibalanus balanoides*. *Global Ecology and Biogeography* 21:716-724.
- 511 Kim D, Langmead B, Salzberg SL. 2015. HISAT: a fast spliced aligner with low memory  
512 requirements. *Nat Methods* 12:357-360.
- 513 Kimura M, Crow J. 1964. The number of alleles that can be maintained in a finite  
514 population. *Genetics* 49:725-738.
- 515 King JL. 1967. Continuously distributed factors affecting fitness. *Genetics* 55:483-492.
- 516 Kofler R, Orozco-terWengel P, De Maio N, Pandey RV, Nolte V, Futschik A, Kosiol C,  
517 Schlotterer C. 2011. PoPoolation: a toolbox for population genetic analysis of next  
518 generation sequencing data from pooled individuals. *PLoS ONE* 6:e15925.
- 519 Kofler R, Pandey RV, Schlotterer C. 2011. PoPoolation2: identifying differentiation  
520 between populations using sequencing of pooled DNA samples (Pool-Seq).  
521 *Bioinformatics* 27:3435-3436.
- 522 Lee Y, Lee Y, Lee J, Bang S, Hyun S, Kang J, Hong ST, Bae E, Kaang BK, Kim J. 2005.  
523 Pyrexia is a new thermal transient receptor potential channel endowing tolerance to  
524 high temperatures in *Drosophila melanogaster*. *Nat Genet* 37:305-310.
- 525 Levene H. 1953. Genetic Equilibrium When More Than One Ecological Niche Is  
526 Available. *American Naturalist* 87:331-333.
- 527 Lewontin RC, Hubby JL. 1966. A molecular approach to the study of genic  
528 heterozygosity in natural populations. II. Amount of variation and degree of  
529 heterozygosity in natural populations of *Drosophila pseudoobscura*. *Genetics* 54:595-  
530 609.
- 531 Li H. 2013. Aligning sequence reads, clone sequences and assembly contigs with BWA-  
532 MEM. arXiv:1303.3997.

- 533 Li H, Handsaker B, Wysoker A, Fennell T, Ruan J, Homer N, Marth G, Abecasis G,  
534 Durbin R, Genome Project Data Processing S. 2009. The Sequence Alignment/Map  
535 format and SAMtools. *Bioinformatics* 25:2078-2079.
- 536 Machado HE, Bergland AO, Taylor R, Tilk S, Behrman E, Dyer K, Fabian DK, Flatt T,  
537 González J, Karasov TL, et al. 2019. Broad geographic sampling reveals predictable and  
538 pervasive seasonal adaptation in *Drosophila*. *bioRxiv* (unpublished data)  
539 <https://www.biorxiv.org/content/biorxiv/early/2019/10/11/337543.full.pdf> - last  
540 accessed December 12, 2019.
- 541 Mackay TF, Richards S, Stone EA, Barbadilla A, Ayroles JF, Zhu D, Casillas S, Han Y,  
542 Magwire MM, Cridland JM, et al. 2012. The *Drosophila melanogaster* Genetic Reference  
543 Panel. *Nature* 482:173-178.
- 544 Maggs CA, Castilho R, Foltz D, Henzler C, Jolly MT, Kelly J, Olsen J, Perez KE, Stam W,  
545 Väinölä R, et al. 2008. Evaluating Signatures of Glacial Refugia for North Atlantic  
546 Benthic Marine Taxa. *Ecology* 89:S108-S122.
- 547 Malinsky M, Matschiner M, Svoldal H. 2020. Dsuite - fast D-statistics and related  
548 admixture evidence from VCF files. *bioRxiv* (unpublished data)  
549 <https://www.biorxiv.org/content/10.1101/634477v2> - last accessed May 1, 2020.
- 550 Messer PW, Petrov DA. 2013. Population genomics of rapid adaptation by soft selective  
551 sweeps. *Trends Ecol Evol* 28:659-669.
- 552 Metz EC, Palumbi SR. 1996. Positive selection and sequence rearrangements generate  
553 extensive polymorphism in the gamete recognition protein bindin. *Mol Biol Evol* 13:397-  
554 406.
- 555 Milkman RD. 1967. Heterosis as a Major Cause of Heterozygosity in Nature. *Genetics*  
556 55:493-&.
- 557 Nunez JCB, Elyanow RG, Ferranti DA, Rand DM. 2018. Population Genomics and  
558 Biogeography of the Northern Acorn Barnacle (*Semibalanus balanoides*) Using Pooled

- 559 Sequencing Approaches. In: Oleksiak MF, Rajora OP, editors. Population Genomics:  
560 Marine Organisms: Springer, Cham. p. 139-168.
- 561 Nunez JCB, Flight PA, Neil KB, Rong S, Eriksson LA, Ferranti DA, Rosenblad MA,  
562 Blomberg A, Rand DM. 2020. Footprints of natural selection at the mannose-6-  
563 phosphate isomerase locus in barnacles. *Proc Natl Acad Sci U S A*:201918232.
- 564 Patton H, Hubbard A, Andreassen K, Auriac A, Whitehouse PL, Stroeven AP, Shackleton  
565 C, Winsborrow M, Heyman J, Hall AM. 2017. Deglaciation of the Eurasian ice sheet  
566 complex. *Quaternary Science Reviews* 169:148-172.
- 567 Perez-Losada M, Harp M, Hoeg JT, Achituv Y, Jones D, Watanabe H, Crandall KA.  
568 2008. The tempo and mode of barnacle evolution. *Mol Phylogenet Evol* 46:328-346.
- 569 Pickrell JK, Pritchard JK. 2012. Inference of population splits and mixtures from  
570 genome-wide allele frequency data. *PLoS Genet* 8:e1002967.
- 571 Pineda J, Starczak V, Stueckle TA. 2006. Timing of successful settlement:  
572 demonstration of a recruitment window in the barnacle *Semibalanus balanoides*.  
573 *Marine Ecology Progress Series* 320:233-237.
- 574 Prysycz LP, Gabaldon T. 2016. Redundans: an assembly pipeline for highly heterozygous  
575 genomes. *Nucleic Acids Research* 44:e113.
- 576 Rand DM, Spaeth PS, Sackton TB, Schmidt PS. 2002. Ecological Genetics of Mpi and  
577 Gpi Polymorphisms in the Acorn Barnacle and the Spatial Scale of Neutral and Non-  
578 neutral Variation. *Integrative and Comparative Biology* 42:825-836.
- 579 Reich D, Thangaraj K, Patterson N, Price AL, Singh L. 2009. Reconstructing Indian  
580 population history. *Nature* 461:489-494.
- 581 Ruddiman WF, McIntyre A. 1981. The North-Atlantic Ocean during the Last  
582 Deglaciation. *Palaeogeography Palaeoclimatology Palaeoecology* 35:145-214.
- 583 Sanford E, Menge BA. 2001. Spatial and temporal variation in barnacle growth in a  
584 coastal upwelling system. *Marine Ecology Progress Series* 209:143-157.



- 585 Schiffels S, Durbin R. 2014. Inferring human population size and separation history  
586 from multiple genome sequences. *Nat Genet* 46:919-925.
- 587 Schlotterer C, Tobler R, Kofler R, Nolte V. 2014. Sequencing pools of individuals-mining  
588 genome-wide polymorphism data without big funding. *Nature Reviews Genetics* 15:749-  
589 763.
- 590 Schmidt PS, Bertness MD, Rand DM. 2000. Environmental heterogeneity and balancing  
591 selection in the acorn barnacle *Semibalanus balanoides*. *Proc Biol Sci* 267:379-384.
- 592 Schmidt PS, Rand DM. 2001. Adaptive maintenance of genetic polymorphism in an  
593 intertidal barnacle: habitat- and life-stage-specific survivorship of *Mpi* genotypes.  
594 *Evolution* 55:1336-1344.
- 595 Schmidt PS, Rand DM. 1999. Intertidal microhabitat and selection at *Mpi*: Interlocus  
596 contrasts in the northern acorn barnacle, *Semibalanus balanoides*. *Evolution* 53:135-  
597 146.
- 598 Schmidt PS, Serrão EA, Pearson GA, Riginos C, Rawson PD, Hilbish TJ, Brawley SH,  
599 Trussell GC, Carrington E, Wetthey DS, et al. 2008. Ecological Genetics in the North  
600 Atlantic: Environmental Gradients and Adaptation at Specific Loci. *Ecology* 89:S91-  
601 S107.
- 602 Stanke M, Waack S. 2003. Gene prediction with a hidden Markov model and a new  
603 intron submodel. *Bioinformatics* 19:ii215-ii225.
- 604 Sundell K, Wrange AL, Jonsson PR, Blomberg A. 2019. Osmoregulation in Barnacles:  
605 An Evolutionary Perspective of Potential Mechanisms and Future Research Directions.  
606 *Front Physiol* 10:877.
- 607 Sved JA, Reed TE, Bodmer WF. 1967. The Number of Balanced Polymorphisms That  
608 Can Be Maintained in a Natural Population. *Genetics* 55:469-481.
- 609 Tracey WD, Wilson RI, Laurent G, Benzer S. 2003. *painless*, a *Drosophila* Gene  
610 Essential for Nociception. *Cell* 113:261-273.

- 611 Uyenoyama MK. 2005. Evolution under tight linkage to mating type. *New Phytol*  
612 165:63-70.
- 613 Väinölä R. 2003. Repeated trans-Arctic invasions in littoral bivalves: molecular  
614 zoogeography of the *Macoma balthica* complex. *Marine Biology* 143:935-946.
- 615 Veliz D, Bourget E, Bernatchez L. 2004. Regional variation in the spatial scale of  
616 selection at MPI\* and GPI\* in the acorn barnacle *Semibalanus balanoides* (Crustacea). *J*  
617 *Evol Biol* 17:953-966.
- 618 Vermeij GJ. 1991. Anatomy of an invasion: the trans-Arctic interchange. *Paleobiology*  
619 17:281-307.
- 620 Wares JP, Cunningham CW. 2001. Phylogeography and Historical Ecology of the North  
621 Atlantic Intertidal. *Evolution* 55:2455-2469.
- 622 Watt WB, Dean AM. 2000. Molecular-functional studies of adaptive genetic variation in  
623 prokaryotes and eukaryotes. *Annu Rev Genet* 34:593-622.
- 624 Williams G. 1966. *Adaptation and Natural Selection: A Critique of Some Current*  
625 *Evolutionary Thought*. Princeton, NJ.: Princeton University Press.
- 626 Wittmann MJ, Bergland AO, Feldman MW, Schmidt PS, Petrov DA. 2017. Seasonally  
627 fluctuating selection can maintain polymorphism at many loci via segregation lift. *Proc*  
628 *Natl Acad Sci U S A* 114:E9932-E9941.
- 629 Wray GA. 2007. The evolutionary significance of cis-regulatory mutations. *Nature*  
630 *Reviews Genetics* 8:206-216.
- 631 Wu Q, Han TS, Chen X, Chen JF, Zou YP, Li ZW, Xu YC, Guo YL. 2017. Long-term  
632 balancing selection contributes to adaptation in *Arabidopsis* and its relatives. *Genome*  
633 *Biol* 18:217.
- 634 Xu SY, Cang CL, Liu XF, Peng YQ, Ye YZ, Zhao ZQ, Guo AK. 2006. Thermal nociception  
635 in adult *Drosophila*: behavioral characterization and the role of the painless gene. *Genes*  
636 *Brain Behav* 5:602-613.

637 Ye C, Hill CM, Wu S, Ruan J, Ma ZS. 2016. DBG2OLC: Efficient Assembly of Large  
638 Genomes Using Long Erroneous Reads of the Third Generation Sequencing  
639 Technologies. *Sci Rep* 6:31900.  
640

641 **Figure 1. Genetic variation and phylogeography**

642

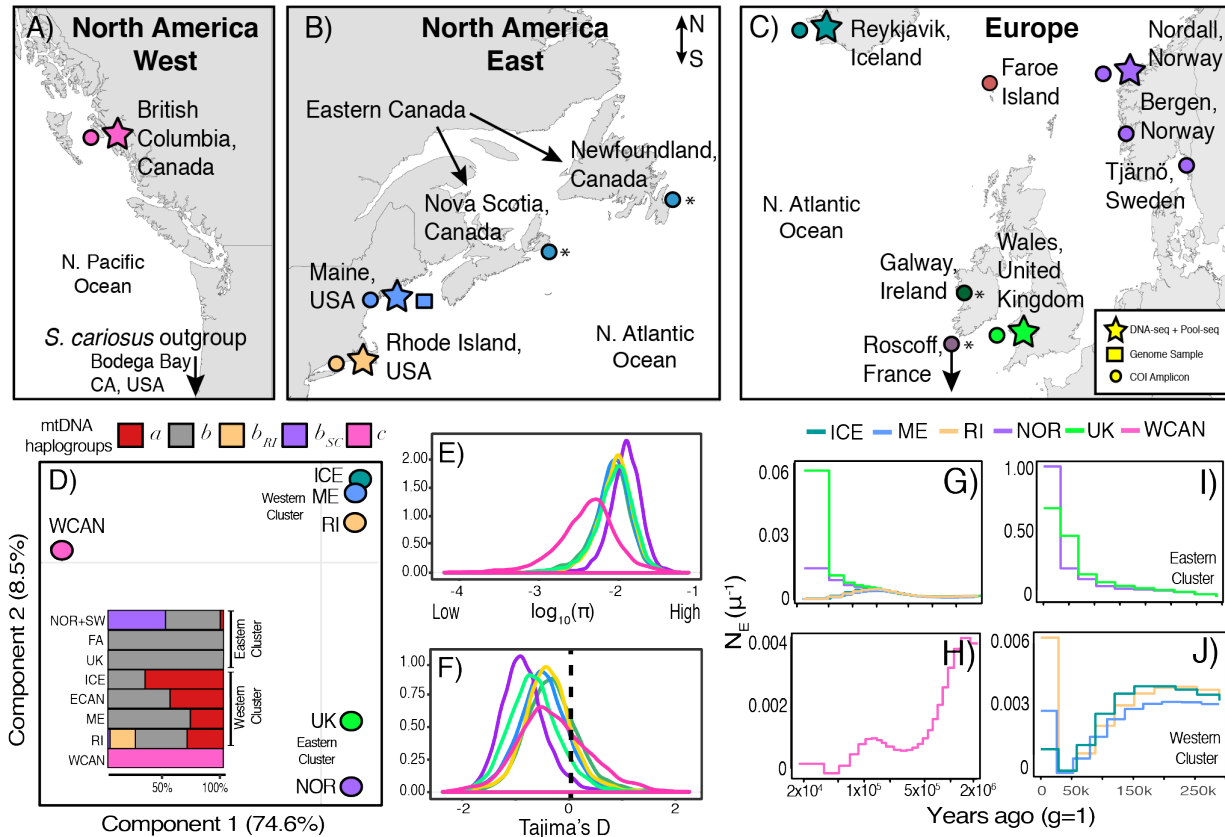

643

644 **A.** Map of the North Pacific coast of North America with collection sites indicated.

645 **B.** Collections in the Atlantic Eastern coast of North America. **C.** Collections in the

646 Atlantic European coast. For A, B, and C, stars indicate sites where a single individual and

647 a pool of multiple individuals were collected, the hexagon indicates the site from which

648 the reference genome was constructed, and the circles indicate sites where *COX I* data was

649 collected. The asterisks indicate cases where *COX I* data was downloaded. **D.** PCA with

650 Pool-seq data from all populations. The colors represent populations. Pacific Canada

651 (WCAN; pink), Maine (ME; blue), Rhode Island (RI; yellow), Iceland (ICE; dark green),

652 Norway (NOR; purple), United Kingdom (UK; light green). **D-inset.** Distribution of

653 mitochondrial haplotypes across all populations. The names *a*, *b* (including *b<sub>RI</sub>* and *b<sub>SC</sub>*),

654 and *c* represent common mtDNA haplotypes observed in populations. **E.** Nucleotide

655 diversity ( $\log_{10} \pi$ ) for all nuclear genes across all populations. **F.** Tajima's *D* for all nuclear

656 genes across all populations. The dashed vertical line marks 0, the expected value under

657 a neutral model. The y-axis in E and F show the density of observations. **G.** Demographic

658 reconstruction for North Atlantic individuals showing demographic changes from 2 mya  
659 to 200 kya. **I.** demographic changes in British and Norwegian individuals. **H.** North  
660 Pacific individual showing demographic changes from 2 mya to 200 kya. **J.** Plot of recent  
661 (today – 250 kya) demographic changes in the North American and Icelandic individuals.

662 **Figure 2. Evidence for balancing selection across the genome**

663

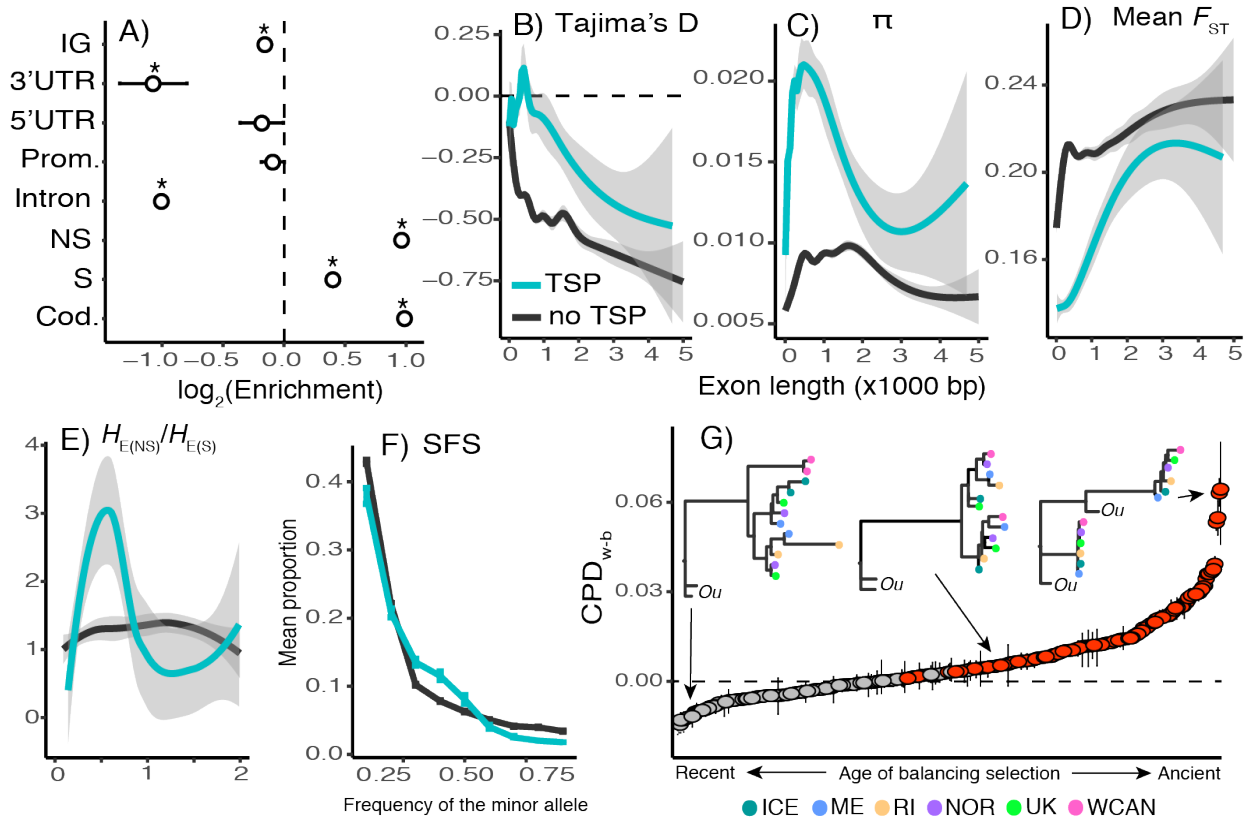

664

665 **A.** Enrichment analysis of TSPs across the genome of *S. balanoides* based on all

666 populations studied. The asterisks symbols represent statistical significance.

667 Abbreviations: promoters (Prom.), nonsynonymous loci (NS), synonymous loci (S),

668 coding loci (Cod.). **B.** Plot of Tajima's  $D$  (as a function of length) of exons bearing TSPs

669 versus all other exons not bearing TSPs. **C.** Same as B but for nucleotide diversity ( $\pi$ ). **D.**

670 Same as B but for mean  $F_{ST}$ . **E.** Same as B but for the ratio of nonsynonymous

671 heterozygosity to synonymous heterozygosity. **F.** Site frequency spectrum for whole genes

672 with TSPs vs other genes. Vertical bars are 95% confidence intervals. **G.** Candidate genes

673 under balancing selection ranked according to their  $CPD_{w-b}$  values (interquartile ranges

674 shown as error bars). Red values indicate statistical significance. Horizontal dashed line

675 indicates  $CPD_{w-b} = 0$ . Three example allele tree topologies are shown. The sister taxon, *S.*

676 *cariosus*, is shown as "Ou" (for outgroup). The x-axis for B, C, D, and E is exon length (x

677 1000 bp).

678



679 **Figure 3. Balancing selection on ecologically important genes**

680

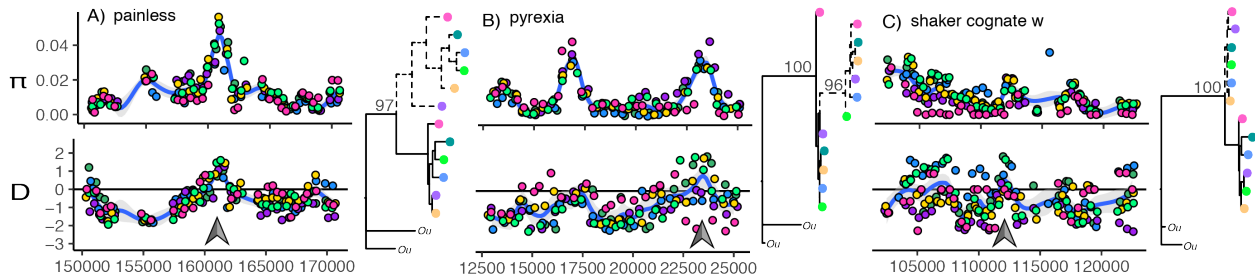

681

682

683 We present patterns of genetic variation ( $\pi$  and  $D$  estimated from pool-seq data,  
684 and allele tree topologies estimated from single individuals) for 3 example genes: A)  
685 painless (*Pain*), B) pyrexia (*Pyx*), C) shaker cognate w (*Shaw*). Grey arrows show regions  
686 that contain TSPs. In Tajima's  $D$  panels, the horizontal line marks the  $D = 0$  point. For all  
687 trees, the sister taxon, *S. cariosus*, is shown as "*Ou*". The colors represent populations.  
688 WCAN (pink), ME (blue), RI (yellow), ICE (dark green), NOR (purple), UK (light green).  
689 The x-axis shows base pair position within scaffolds.
